# Supplementary material for: Foods, Nutrients, and Risk of In-Hospital Frailty in Women: Findings from a Large Prospective Cohort Study
Source: MDPI journal article supplement (doi:10.3390/nu15214619), 2023-10-31
Supplement: s1 [file s1]

# Foods, nutrients and risk of in-hospital frailty in women: findings from a large prospective cohort study

## Supplementary Methods

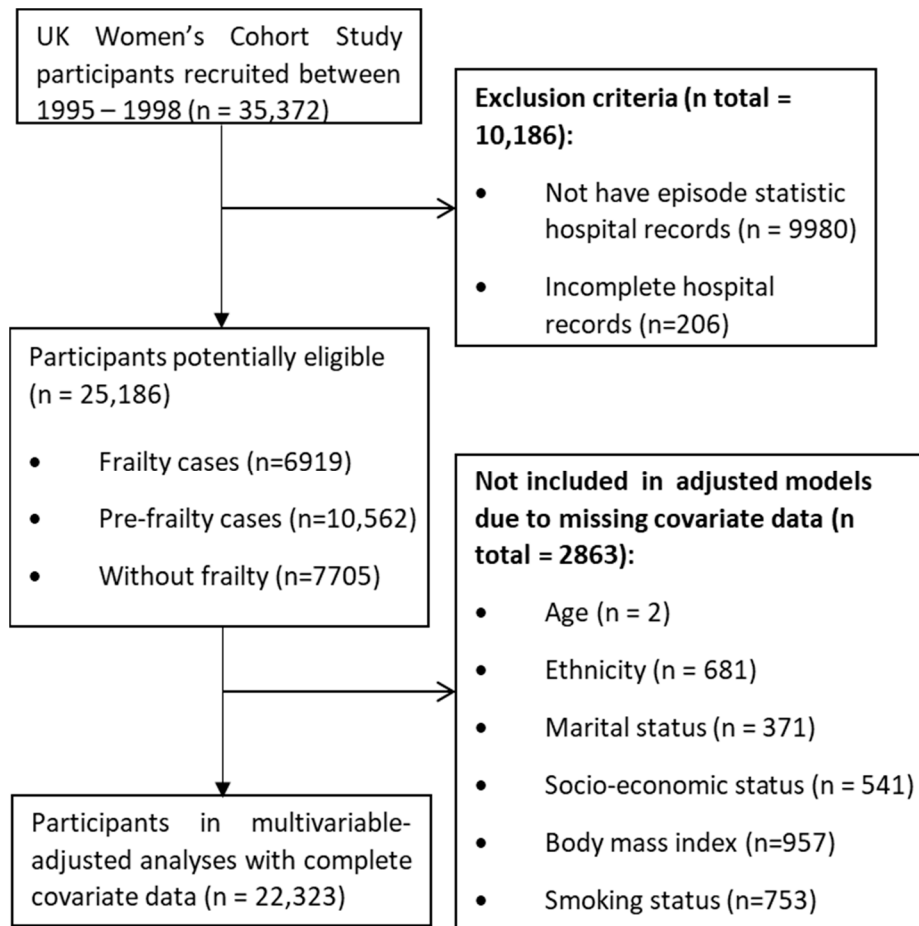

Supplementary Figure S1 The flow chart of UKWCS participants for this study

Supplementary Table S2 Transformation from intake frequencies to portion servings per day

| Frequency of intake    | Portion servings per day (formula) |
|------------------------|------------------------------------|
| Never                  | 0                                  |
| Less than once a month | 0.02 (0.5/30)                      |
| 1-3 per month          | 0.07 (2.0/30)                      |
| Once a week            | 0.14 (1.0/7)                       |
| 2-4 per week           | 0.40 (3.0/7)                       |
| 5-6 per week           | 0.80 (5.5/7)                       |
| Once per day           | 1.00 (1.0/1)                       |
| 2-3 per day            | 2.50 (2.5/1)                       |
| 4-5 per day            | 4.50 (4.5/1)                       |
| 6+ per day             | 6.00 (6.0/1)                       |

Supplementary Table S2 Frailty related ICD-10 diagnostic codes derived from Gilbert *et al.* [1]

| ICD Code | ICD Description                                                                               | Points awarded | ICD Code | ICD Description                                                           | Points awarded |
|----------|-----------------------------------------------------------------------------------------------|----------------|----------|---------------------------------------------------------------------------|----------------|
| F00      | Dementia in Alzheimer's disease                                                               | 7·1            | E16      | Other disorders of pancreatic internal secretion                          | 1·4            |
| G81      | Hemiplegia                                                                                    | 4·4            | R94      | Abnormal results of function studies                                      | 1·4            |
| G30      | Alzheimer's disease                                                                           | 4·0            | N18      | Chronic renal failure                                                     | 1·4            |
| I69      | Sequelae of cerebrovascular disease                                                           | 3·7            | R33      | Retention of urine                                                        | 1·3            |
| R29      | Other symptoms and signs involving the nervous and musculoskeletal systems                    | 3·6            | R69      | Unknown and unspecified causes of morbidity                               | 1·3            |
| N39      | Other disorders of urinary system (includes urinary tract infection and urinary incontinence) | 3·2            | N28      | Other disorders of kidney and ureter, not elsewhere classified            | 1·3            |
| F05      | Delirium, not induced by alcohol and other psychoactive substances                            | 3·2            | R32      | Unspecified urinary incontinence                                          | 1·2            |
| W19      | Unspecified fall                                                                              | 3·2            | G31      | Other degenerative diseases of nervous system, not elsewhere classified   | 1·2            |
| S00      | Superficial injury of head                                                                    | 3·2            | Y95      | Nosocomial condition                                                      | 1·2            |
| R31      | Unspecified haematuria                                                                        | 3·0            | S09      | Other and unspecified injuries of head                                    | 1·2            |
| B96      | "Other bacterial agents as the cause of diseases classified to other chapters"                | 2·9            | R45      | Symptoms and signs involving emotional state                              | 1·2            |
| R41      | "Other symptoms and signs involving cognitive functions and awareness"                        | 2·7            | G45      | Transient cerebral ischaemic attacks and related syndromes                | 1·2            |
| R26      | Abnormalities of gait and mobility                                                            | 2·6            | Z74      | Problems related to care-provider dependency                              | 1·1            |
| I67      | Other cerebrovascular diseases                                                                | 2·6            | M79      | Other soft tissue disorders, not elsewhere classified                     | 1·1            |
| R56      | Convulsions, not elsewhere classified                                                         | 2·6            | W06      | Fall involving bed                                                        | 1·1            |
| R40      | Somnolence, stupor and coma                                                                   | 2·5            | S01      | Open wound of head                                                        | 1·1            |
| T83      | "Complications of genitourinary prosthetic devices, implants and grafts"                      | 2·4            | A04      | Other bacterial intestinal infections                                     | 1·1            |
| S06      | Intracranial injury                                                                           | 2·4            | A09      | Diarrhoea and gastroenteritis of presumed infectious origin               | 1·1            |
| S42      | Fracture of shoulder and upper arm                                                            | 2·3            | J18      | Pneumonia, organism unspecified                                           | 1·1            |
| E87      | "Other disorders of fluid, electrolyte and acid base balance"                                 | 2·3            | J69      | Pneumonitis due to solids and liquids                                     | 1·0            |
| M25      | Other joint disorders, not elsewhere classified                                               | 2·3            | R47      | Speech disturbances, not elsewhere classified                             | 1·0            |
| E86      | Volume depletion                                                                              | 2·3            | E55      | Vitamin D deficiency                                                      | 1·0            |
| R54      | Senility                                                                                      | 2·2            | Z93      | Artificial opening status                                                 | 1·0            |
| Z50      | "Care involving use of rehabilitation procedures"                                             | 2·1            | R02      | Gangrene, not elsewhere classified                                        | 1·0            |
| F03      | Unspecified dementia                                                                          | 2·1            | R63      | Symptoms and signs concerning food and fluid intake                       | 0·9            |
| W18      | Other fall on same level                                                                      | 2·1            | H91      | Other hearing loss                                                        | 0·9            |
| Z75      | "Problems related to medical facilities and other health care"                                | 2·0            | W10      | Fall on and from stairs and steps                                         | 0·9            |
| F01      | Vascular dementia                                                                             | 2·0            | W01      | Fall on same level from slipping, tripping and stumbling                  | 0·9            |
| S80      | Superficial injury of lower leg                                                               | 2·0            | E05      | Thyrotoxicosis [hyperthyroidism]                                          | 0·9            |
| L03      | Cellulitis                                                                                    | 2·0            | M41      | Scoliosis                                                                 | 0·9            |
| H54      | Blindness and low vision                                                                      | 1·9            | R13      | Dysphagia                                                                 | 0·8            |
| E53      | Deficiency of other B group vitamins                                                          | 1·9            | Z99      | Dependence on enabling machines and devices                               | 0·8            |
| Z60      | Problems related to social environment                                                        | 1·8            | U80      | Agent resistant to penicillin and related antibiotics                     | 0·8            |
| G20      | Parkinson's disease                                                                           | 1·8            | M80      | Osteoporosis with pathological fracture                                   | 0·8            |
| R55      | Syncope and collapse                                                                          | 1·8            | K92      | Other diseases of digestive system                                        | 0·8            |
| S22      | Fracture of rib(s), sternum and thoracic spine                                                | 1·8            | I63      | Cerebral Infarction                                                       | 0·8            |
| K59      | Other functional intestinal disorders                                                         | 1·8            | N20      | Calculus of kidney and ureter                                             | 0·7            |
| N17      | Acute renal failure                                                                           | 1·8            | F10      | Mental and behavioural disorders due to use of alcohol                    | 0·7            |
| L89      | Decubitus ulcer                                                                               | 1·7            | Y84      | Other medical procedures as the cause of abnormal reaction of the patient | 0·7            |
| Z22      | Carrier of infectious disease                                                                 | 1·7            | R00      | Abnormalities of heart beat                                               | 0·7            |

|     |                                                                                        |     |     |                                                            |     |
|-----|----------------------------------------------------------------------------------------|-----|-----|------------------------------------------------------------|-----|
| B95 | Streptococcus and staphylococcus as the cause of diseases classified to other chapters | 1·7 | J22 | Unspecified acute lower respiratory infection              | 0·7 |
| L97 | Ulcer of lower limb, not elsewhere classified                                          | 1·6 | Z73 | Problems related to life-management difficulty             | 0·6 |
| R44 | Other symptoms and signs involving general sensations and perceptions                  | 1·6 | R79 | Other abnormal findings of blood chemistry                 | 0·6 |
| K26 | Duodenal ulcer                                                                         | 1·6 | Z91 | Personal history of risk-factors, not elsewhere classified | 0·5 |
| I95 | Hypotension                                                                            | 1·6 | S51 | Open wound of forearm                                      | 0·5 |
| N19 | Unspecified renal failure                                                              | 1·6 | F32 | Depressive episode                                         | 0·5 |
| A41 | Other septicaemia                                                                      | 1·6 | M48 | Spinal stenosis (secondary code only)                      | 0·5 |
| Z87 | Personal history of other diseases and conditions                                      | 1·5 | E83 | Disorders of mineral metabolism                            | 0·4 |
| J96 | Respiratory failure, not elsewhere classified                                          | 1·5 | M15 | Polyarthrosis                                              | 0·4 |
| X59 | Exposure to unspecified factor                                                         | 1·5 | D64 | Other anaemias                                             | 0·4 |
| M19 | Other arthrosis                                                                        | 1·5 | L08 | Other local infections of skin and subcutaneous tissue     | 0·4 |
| G40 | Epilepsy                                                                               | 1·5 | R11 | Nausea and vomiting                                        | 0·3 |
| M81 | Osteoporosis without pathological fracture                                             | 1·4 | K52 | Other noninfective gastroenteritis and colitis             | 0·3 |
| S72 | Fracture of femur                                                                      | 1·4 | R50 | Fever of unknown origin                                    | 0·1 |
| S32 | Fracture of lumbar spine and pelvis                                                    | 1·4 |     |                                                            |     |

[1] Gilbert, T., et al., Development and validation of a Hospital Frailty Risk Score focusing on older people in acute care settings using electronic hospital records: an observational study. *The Lancet*, 2018. **391**(10132): p. 1775-1782.

## Supplementary Results

Supplementary Table S3 Profiles of nutrient intakes by frailty score levels within the UK Women's Cohort Study

|               |            | <b>hFRS=0</b><br>(N=7705, 30.6%) | <b>0&lt; hFRS &lt;2</b><br>(N=10,562, 41.9%) | <b>hFRS ≥2</b><br>(N=6919, 27.5%) | <b>P*</b> | <b>All participants</b><br>(N=25,186) |
|---------------|------------|----------------------------------|----------------------------------------------|-----------------------------------|-----------|---------------------------------------|
| Energy intake | (kcal/day) | 2343 (712)                       | 2340 (840)                                   | 2358 (795)                        | 0.289     | 2346 (790)                            |
|               | (MJ/day)   | 10 (3)                           | 10 (4)                                       | 10 (3)                            | 0.289     | 10 (3)                                |
| Protein       | (g/day)    | 89 (27)                          | 90 (34)                                      | 91 (32)                           | <0.001    | 90 (32)                               |
|               | (%energy)  | 15 (3)                           | 16 (3)                                       | 16 (3)                            | <0.001    | 16 (3)                                |
| Carbohydrate  | (g/day)    | 311 (103)                        | 312 (116)                                    | 314 (113)                         | 0.204     | 312 (111)                             |
|               | (%energy)  | 53 (7)                           | 53 (7)                                       | 53 (7)                            | 0.030     | 53 (7)                                |
| Fat           | (g/day)    | 85 (32)                          | 84 (38)                                      | 85 (36)                           | 0.162     | 85 (36)                               |
|               | (%energy)  | 32 (6)                           | 32 (6)                                       | 32 (6)                            | 0.013     | 32 (6)                                |
| SFAs          | (g/day)    | 29 (13)                          | 29 (15)                                      | 30 (14)                           | 0.040     | 29 (14)                               |
|               | (%energy)  | 11 (3)                           | 11 (3)                                       | 11 (3)                            | 0.020     | 11 (3)                                |
| PUFAs         | (g/day)    | 16 (7)                           | 16 (8)                                       | 16 (8)                            | 0.065     | 16 (8)                                |
|               | (%energy)  | 6 (2)                            | 6 (2)                                        | 6 (2)                             | <0.001    | 6 (2)                                 |
| MUFAs         | (g/day)    | 28 (11)                          | 28 (13)                                      | 28 (13)                           | 0.109     | 28 (12)                               |
|               | (%energy)  | 11 (2)                           | 10 (2)                                       | 11 (2)                            | 0.001     | 11 (2)                                |
| Vitamin C     | (mg/MJ)    | 18 (7)                           | 18 (8)                                       | 18 (8)                            | 0.001     | 18 (8)                                |
| Vitamin B1    | (ug/MJ)    | 324 (253)                        | 319 (245)                                    | 310 (245)                         | 0.004     | 318 (247)                             |
| Vitamin B2    | (ug/MJ)    | 263 (67)                         | 270 (69)                                     | 268 (69)                          | <0.001    | 267 (68)                              |
| Vitamin B6    | (ug/MJ)    | 286 (57)                         | 292 (59)                                     | 290 (60)                          | <0.001    | 290 (58)                              |
| Vitamin B12   | (ug/MJ)    | 0.58 (0.29)                      | 0.62 (0.31)                                  | 0.62 (0.30)                       | <0.001    | 0.61 (0.30)                           |
| Folate        | (ug/MJ)    | 41 (9)                           | 42 (10)                                      | 42 (10)                           | <0.001    | 42 (10)                               |
| Vitamin A     | (ug/MJ)    | 103 (53)                         | 109 (58)                                     | 110 (56)                          | <0.001    | 108 (56)                              |
| Vitamin D     | (ug/MJ)    | 0.31 (0.15)                      | 0.33 (0.16)                                  | 0.33 (0.16)                       | <0.001    | 0.33 (0.16)                           |
| Vitamin E     | (ug/MJ)    | 990 (300)                        | 982 (304)                                    | 975 (308)                         | 0.016     | 983 (304)                             |
| Calcium       | (mg/MJ)    | 119 (28)                         | 121 (29)                                     | 119 (29)                          | <0.001    | 120 (29)                              |
| Iron          | (mg/MJ)    | 1.86 (0.56)                      | 1.88 (0.58)                                  | 1.87 (0.58)                       | 0.175     | 1.87 (0.57)                           |
| Zinc          | (mg/MJ)    | 1.17 (0.21)                      | 1.19 (0.22)                                  | 1.19 (0.22)                       | <0.001    | 1.18 (0.22)                           |

\* Difference was tested by Student's t test. SFAs, saturated fatty acids; PUFAs, polyunsaturated fatty acids; MUFAs, monounsaturated fatty acids.

Supplementary Table S4 Associations of nutrient intakes with in-hospital risk of prefrailty and frailty within the UK Women's Cohort Study

|               |             | Risk of Pre-Frailty or more severe (HR, 95%CI) |          |                   |            | Risk of Frailty (HR, 95%CI) |          |                   |            |
|---------------|-------------|------------------------------------------------|----------|-------------------|------------|-----------------------------|----------|-------------------|------------|
|               |             | Unadjusted                                     | <i>P</i> | Adjusted*         | <i>P</i> * | Unadjusted                  | <i>P</i> | Adjusted*         | <i>P</i> * |
| Energy intake | per MJ      | 1.00 (1.00, 1.01)                              | 0.126    | 1.01 (1.00, 1.01) | 0.003      | 1.01 (1.00, 1.02)           | 0.023    | 1.01 (1.01, 1.02) | 0.001      |
| Protein       | per %energy | 1.03 (1.03, 1.04)                              | <0.001   | 1.01 (1.01, 1.02) | <0.001     | 1.03 (1.02, 1.04)           | <0.001   | 1.00 (0.99, 1.01) | 0.386      |
| Carbohydrate  | per %energy | 1.00 (1.00, 1.00)                              | 0.927    | 1.00 (1.00, 1.00) | 0.142      | 1.00 (1.00, 1.00)           | 0.549    | 1.00 (0.99, 1.00) | 0.049      |
| Fat           | per %energy | 1.00 (1.00, 1.00)                              | 0.213    | 1.00 (1.00, 1.00) | 0.639      | 1.00 (1.00, 1.00)           | 0.700    | 1.00 (1.00, 1.01) | 0.290      |
| SFAs          | per %energy | 1.01 (1.00, 1.01)                              | <0.001   | 1.00 (1.00, 1.01) | 0.259      | 1.02 (1.01, 1.03)           | <0.001   | 1.01 (1.00, 1.02) | 0.024      |
| PUFAs         | per %energy | 0.97 (0.96, 0.98)                              | <0.001   | 1.00 (0.99, 1.01) | 0.437      | 0.95 (0.94, 0.97)           | <0.001   | 0.99 (0.98, 1.01) | 0.385      |
| MUFAs         | per %energy | 0.99 (0.99, 1.00)                              | 0.025    | 1.00 (0.99, 1.01) | 0.697      | 1.00 (0.99, 1.01)           | 0.638    | 1.01 (0.99, 1.02) | 0.279      |
| Vitamin C     | per mg/MJ   | 1.00 (1.00, 1.00)                              | 0.202    | 1.00 (1.00, 1.00) | 0.759      | 1.00 (1.00, 1.00)           | 0.906    | 1.00 (0.99, 1.00) | 0.085      |
| Vitamin B1    | per µg/MJ   | 1.00 (1.00, 1.00)                              | <0.001   | 1.00 (1.00, 1.00) | 0.998      | 1.00 (1.00, 1.00)           | <0.001   | 1.00 (1.00, 1.00) | 0.317      |
| Vitamin B2    | per µg/MJ   | 1.00 (1.00, 1.00)                              | <0.001   | 1.00 (1.00, 1.00) | 0.258      | 1.00 (1.00, 1.00)           | 0.004    | 1.00 (1.00, 1.00) | 0.058      |
| Vitamin B6    | per µg/MJ   | 1.00 (1.00, 1.00)                              | <0.001   | 1.00 (1.00, 1.00) | 0.002      | 1.00 (1.00, 1.00)           | <0.001   | 1.00 (1.00, 1.00) | 0.694      |
| Vitamin B12   | per µg/MJ   | 1.36 (1.30, 1.43)                              | <0.001   | 1.11 (1.05, 1.17) | <0.001     | 1.39 (1.29, 1.50)           | <0.001   | 1.04 (0.96, 1.13) | 0.361      |
| Folate        | per µg/MJ   | 1.00 (1.00, 1.00)                              | <0.001   | 1.00 (1.00, 1.00) | 0.365      | 1.00 (1.00, 1.00)           | 0.071    | 1.00 (1.00, 1.00) | 0.291      |
| Vitamin A     | per µg/MJ   | 1.00 (1.00, 1.00)                              | <0.001   | 1.00 (1.00, 1.00) | 0.011      | 1.00 (1.00, 1.00)           | <0.001   | 1.00 (1.00, 1.00) | 0.880      |
| Vitamin D     | per µg/MJ   | 1.37 (1.26, 1.49)                              | <0.001   | 1.08 (0.98, 1.19) | 0.105      | 1.42 (1.25, 1.61)           | <0.001   | 1.00 (0.86, 1.17) | 0.952      |
| Vitamin E     | per µg/MJ   | 1.00 (1.00, 1.00)                              | <0.001   | 1.00 (1.00, 1.00) | 0.178      | 1.00 (1.00, 1.00)           | <0.001   | 1.00 (1.00, 1.00) | 0.178      |
| Calcium       | per mg/MJ   | 1.00 (1.00, 1.00)                              | 0.057    | 1.00 (1.00, 1.00) | 0.403      | 1.00 (1.00, 1.00)           | 0.162    | 1.00 (1.00, 1.00) | <0.001     |
| Iron          | per mg/MJ   | 1.00 (0.97, 1.03)                              | 0.929    | 0.98 (0.95, 1.01) | 0.142      | 0.98 (0.94, 1.02)           | 0.379    | 0.95 (0.90, 0.99) | 0.016      |
| Zinc          | per mg/MJ   | 1.42 (1.33, 1.52)                              | <0.001   | 1.12 (1.04, 1.21) | 0.003      | 1.45 (1.30, 1.62)           | <0.001   | 1.04 (0.92, 1.18) | 0.527      |

HR, Hazards Ratio; 95%CI, 95% Confidence Interval; SFAs, saturated fatty acids; PUFAs, polyunsaturated fatty acids; MUFAs, monounsaturated fatty acids.

\* Adjusted for age, ethnicity, marital status, socioeconomic status, physical activity, body mass index, smoking status, alcohol consumption, and total energy intake

Supplementary Table S5 Subgroup analysis by age on associations between nutrient intakes and in-hospital risk of pre-frailty or more severe within the UK Women's Cohort Study

|               |             | Risk of Pre-frailty or more severe (Hazard Ratio, 95%CI) |            |                   |            | ** <i>P</i> -interaction<br>with age |
|---------------|-------------|----------------------------------------------------------|------------|-------------------|------------|--------------------------------------|
|               |             | <60 years old                                            |            | ≥60 years old     |            |                                      |
|               |             | Adjusted*                                                | <i>P</i> * | Adjusted*         | <i>P</i> * |                                      |
| Energy intake | per MJ      | 1.01 (1.00, 1.01)                                        | 0.057      | 1.01 (1.00, 1.02) | 0.080      | 0.778                                |
| Protein       | per %energy | 1.01 (1.00, 1.02)                                        | 0.002      | 1.02 (1.00, 1.03) | 0.005      | 0.020                                |
| Carbohydrate  | per %energy | 1.00 (1.00, 1.00)                                        | 0.479      | 1.00 (0.99, 1.00) | 0.213      | 0.075                                |
| Fat           | per %energy | 1.00 (0.99, 1.00)                                        | 0.347      | 1.00 (0.99, 1.00) | 0.833      | 0.504                                |
| SFAs          | per %energy | 1.00 (1.00, 1.01)                                        | 0.532      | 1.00 (0.99, 1.01) | 0.721      | 0.420                                |
| PUFAs         | per %energy | 0.99 (0.98, 1.01)                                        | 0.311      | 1.00 (0.98, 1.02) | 0.966      | 0.456                                |
| MUFAs         | per %energy | 1.00 (0.99, 1.01)                                        | 0.465      | 1.00 (0.99, 1.01) | 0.895      | 0.494                                |
| Vitamin C     | per mg/MJ   | 1.00 (1.00, 1.00)                                        | 0.382      | 1.00 (0.99, 1.00) | 0.172      | 0.331                                |
| Vitamin B1    | per µg/MJ   | 1.00 (1.00, 1.00)                                        | 0.664      | 1.00 (1.00, 1.00) | 0.289      | 0.001                                |
| Vitamin B2    | per µg/MJ   | 1.00 (1.00, 1.00)                                        | 0.230      | 1.00 (1.00, 1.00) | 0.300      | 0.327                                |
| Vitamin B6    | per µg/MJ   | 1.00 (1.00, 1.00)                                        | 0.003      | 1.00 (1.00, 1.00) | 0.066      | 0.314                                |
| Vitamin B12   | per µg/MJ   | 1.14 (1.06, 1.22)                                        | <0.001     | 1.10 (1.01, 1.21) | 0.033      | 0.336                                |
| Folate        | per µg/MJ   | 1.00 (1.00, 1.00)                                        | 0.309      | 1.00 (1.00, 1.00) | 0.601      | 0.897                                |
| Vitamin A     | per µg/MJ   | 1.00 (1.00, 1.00)                                        | 0.001      | 1.00 (1.00, 1.00) | 0.664      | 0.551                                |
| Vitamin D     | per µg/MJ   | 1.05 (0.93, 1.18)                                        | 0.472      | 1.16 (1.00, 1.35) | 0.045      | 0.064                                |
| Vitamin E     | per µg/MJ   | 1.00 (1.00, 1.00)                                        | 0.100      | 1.00 (1.00, 1.00) | 0.786      | 0.923                                |
| Calcium       | per mg/MJ   | 1.00 (1.00, 1.00)                                        | 0.732      | 1.00 (1.00, 1.00) | 0.167      | 0.188                                |
| Iron          | per mg/MJ   | 0.97 (0.94, 1.01)                                        | 0.131      | 0.99 (0.95, 1.04) | 0.829      | 0.127                                |
| Zinc          | per mg/MJ   | 1.11 (1.01, 1.22)                                        | 0.028      | 1.21 (1.06, 1.38) | 0.005      | 0.007                                |

95%CI, 95% Confidence Interval; SFAs, saturated fatty acids; PUFAs, polyunsaturated fatty acids; MUFAs, monounsaturated fatty acids.

\* Adjusted for age, ethnicity, marital status, socioeconomic status, physical activity, body mass index, smoking status, alcohol consumption, and total energy intake

\*\**P*-interaction represents the statistical significance for interaction item of dietary factor and age where age was modelled linearly in the Cox proportional regression.

Supplementary Table S6 Subgroup analysis by age on associations between nutrient intakes and in-hospital risk of frailty within the UK Women's Cohort Study

|               |             | Risk of Frailty (Hazard Ratio, 95%CI) |            |                   |            | * <i>P</i> -interaction<br>with age |
|---------------|-------------|---------------------------------------|------------|-------------------|------------|-------------------------------------|
|               |             | <60 years old                         |            | ≥60 years old     |            |                                     |
|               |             | Adjusted*                             | <i>P</i> * | Adjusted*         | <i>P</i> * |                                     |
| Energy intake | per MJ      | 1.01 (1.00, 1.02)                     | 0.012      | 1.01 (0.99, 1.02) | 0.229      | 0.127                               |
| Protein       | per %energy | 1.01 (1.00, 1.02)                     | 0.135      | 1.00 (0.99, 1.02) | 0.815      | 0.319                               |
| Carbohydrate  | per %energy | 1.00 (0.99, 1.00)                     | 0.355      | 0.99 (0.99, 1.00) | 0.082      | 0.279                               |
| Fat           | per %energy | 1.00 (0.99, 1.01)                     | 0.797      | 1.01 (1.00, 1.01) | 0.165      | 0.100                               |
| SFAs          | per %energy | 1.00 (0.99, 1.01)                     | 0.676      | 1.02 (1.00, 1.03) | 0.017      | 0.019                               |
| PUFAs         | per %energy | 1.00 (0.98, 1.02)                     | 0.710      | 0.98 (0.96, 1.01) | 0.259      | 0.057                               |
| MUFAs         | per %energy | 1.00 (0.99, 1.02)                     | 0.848      | 1.01 (0.99, 1.03) | 0.247      | 0.249                               |
| Vitamin C     | per mg/MJ   | 1.00 (0.99, 1.00)                     | 0.551      | 1.00 (0.99, 1.00) | 0.102      | 0.914                               |
| Vitamin B1    | per µg/MJ   | 1.00 (1.00, 1.00)                     | 0.791      | 1.00 (1.00, 1.00) | 0.077      | 0.007                               |
| Vitamin B2    | per µg/MJ   | 1.00 (1.00, 1.00)                     | 0.619      | 1.00 (1.00, 1.00) | 0.127      | 0.823                               |
| Vitamin B6    | per µg/MJ   | 1.00 (1.00, 1.00)                     | 0.569      | 1.00 (1.00, 1.00) | 0.502      | 0.154                               |
| Vitamin B12   | per µg/MJ   | 1.12 (1.00, 1.25)                     | 0.047      | 0.98 (0.86, 1.12) | 0.780      | 0.808                               |
| Folate        | per µg/MJ   | 1.00 (1.00, 1.00)                     | 0.853      | 1.00 (0.99, 1.00) | 0.380      | 0.829                               |
| Vitamin A     | per µg/MJ   | 1.00 (1.00, 1.00)                     | 0.196      | 1.00 (1.00, 1.00) | 0.422      | 0.770                               |
| Vitamin D     | per µg/MJ   | 1.05 (0.85, 1.28)                     | 0.655      | 0.99 (0.78, 1.25) | 0.914      | 0.357                               |
| Vitamin E     | per µg/MJ   | 1.00 (1.00, 1.00)                     | 0.329      | 1.00 (1.00, 1.00) | 0.210      | 0.626                               |
| Calcium       | per mg/MJ   | 1.00 (1.00, 1.00)                     | 0.060      | 1.00 (1.00, 1.00) | <0.001     | 0.087                               |
| Iron          | per mg/MJ   | 0.95 (0.90, 1.01)                     | 0.123      | 0.95 (0.89, 1.02) | 0.145      | 0.496                               |
| Zinc          | per mg/MJ   | 1.09 (0.93, 1.27)                     | 0.289      | 1.05 (0.86, 1.27) | 0.648      | 0.087                               |

95%CI, 95% Confidence Interval; SFAs, saturated fatty acids; PUFAs, polyunsaturated fatty acids; MUFAs, monounsaturated fatty acids.

\* Adjusted for age, ethnicity, marital status, socioeconomic status, physical activity, body mass index, smoking status, alcohol consumption, and total energy intake

\*\**P*-interaction represents the statistical significance for interaction item of dietary factor and age where age was modelled linearly in the Cox proportional regression.

Supplementary Table S7 Sensitivity analysis to check for reverse causation on main foods (per 10g/MJ) within the UK Women's Cohort Study

|                    | Risk of Pre-Frailty or more severe (HR, 95%CI) |          |                   |            | Risk of Frailty (HR, 95%CI) |          |                   |            |
|--------------------|------------------------------------------------|----------|-------------------|------------|-----------------------------|----------|-------------------|------------|
|                    | Unadjusted                                     | <i>P</i> | Adjusted*         | <i>P</i> * | Unadjusted                  | <i>P</i> | Adjusted*         | <i>P</i> * |
| <b>Food groups</b> |                                                |          |                   |            |                             |          |                   |            |
| Vegetables         | 1.00 (0.99, 1.01)                              | 0.691    | 1.00 (0.99, 1.01) | 0.640      | 0.99 (0.98, 1.01)           | 0.328    | 0.99 (0.97, 1.01) | 0.290      |
| Fruits             | 1.01 (1.00, 1.01)                              | 0.047    | 1.00 (0.99, 1.01) | 0.481      | 1.01 (1.00, 1.03)           | 0.010    | 1.00 (0.98, 1.01) | 0.534      |
| Total fish         | 1.16 (1.10, 1.23)                              | <0.001   | 1.00 (0.94, 1.06) | 0.923      | 1.20 (1.10, 1.30)           | <0.001   | 0.95 (0.86, 1.05) | 0.335      |
| Processed meat     | 1.69 (1.52, 1.88)                              | <0.001   | 1.29 (1.14, 1.46) | <0.001     | 1.85 (1.57, 2.19)           | <0.001   | 1.30 (1.07, 1.59) | 0.010      |
| Red meat           | 1.25 (1.20, 1.30)                              | <0.001   | 1.12 (1.06, 1.17) | <0.001     | 1.36 (1.27, 1.45)           | <0.001   | 1.17 (1.09, 1.26) | <0.001     |
| Poultry            | 1.12 (1.04, 1.21)                              | 0.002    | 1.06 (0.98, 1.16) | 0.167      | 1.07 (0.95, 1.21)           | 0.252    | 0.99 (0.87, 1.14) | 0.931      |
| Total meat         | 1.16 (1.12, 1.19)                              | <0.001   | 1.07 (1.04, 1.11) | <0.001     | 1.20 (1.15, 1.25)           | <0.001   | 1.09 (1.04, 1.15) | 0.001      |

HR, Hazards Ratio; 95%CI, 95% Confidence Interval.

\*Adjusted for age, ethnicity, marital status, socioeconomic status, physical activity, body mass index, smoking status, alcohol consumption, and total energy intake;



Supplementary Table S8 Sensitivity analysis to check for reverse causation on nutrient intakes within the UK Women's Cohort Study

|               |             | Risk of Pre-Frailty or more severe (HR, 95%CI) |          |                   |            | Risk of Frailty (HR, 95%CI) |          |                   |            |
|---------------|-------------|------------------------------------------------|----------|-------------------|------------|-----------------------------|----------|-------------------|------------|
|               |             | Unadjusted                                     | <i>P</i> | Adjusted*         | <i>P</i> * | Unadjusted                  | <i>P</i> | Adjusted*         | <i>P</i> * |
| Energy intake | per MJ      | 1.00 (1.00, 1.01)                              | 0.322    | 1.01 (1.00, 1.01) | 0.056      | 1.01 (1.00, 1.02)           | 0.051    | 1.01 (1.00, 1.02) | 0.008      |
| Protein       | per %energy | 1.03 (1.02, 1.03)                              | <0.001   | 1.01 (1.00, 1.01) | 0.028      | 1.03 (1.02, 1.04)           | <0.001   | 1.00 (0.99, 1.01) | 0.950      |
| Carbohydrate  | per %energy | 1.00 (1.00, 1.00)                              | 0.929    | 1.00 (1.00, 1.00) | 0.178      | 1.00 (1.00, 1.00)           | 0.839    | 1.00 (0.99, 1.00) | 0.156      |
| Fat           | per %energy | 1.00 (1.00, 1.00)                              | 0.276    | 1.00 (1.00, 1.00) | 0.924      | 1.00 (1.00, 1.00)           | 0.963    | 1.00 (1.00, 1.01) | 0.315      |
| SFAs          | per %energy | 1.01 (1.00, 1.01)                              | 0.002    | 1.00 (1.00, 1.01) | 0.243      | 1.02 (1.01, 1.02)           | <0.001   | 1.01 (1.00, 1.02) | 0.059      |
| PUFAs         | per %energy | 0.97 (0.96, 0.98)                              | <0.001   | 1.00 (0.99, 1.01) | 0.945      | 0.96 (0.94, 0.97)           | <0.001   | 1.00 (0.98, 1.01) | 0.758      |
| MUFAs         | per %energy | 0.99 (0.99, 1.00)                              | 0.056    | 1.00 (0.99, 1.01) | 0.968      | 1.00 (0.98, 1.01)           | 0.395    | 1.01 (0.99, 1.02) | 0.379      |
| Vitamin C     | per mg/MJ   | 1.00 (1.00, 1.00)                              | 0.084    | 1.00 (1.00, 1.00) | 0.936      | 1.00 (1.00, 1.01)           | 0.224    | 1.00 (0.99, 1.00) | 0.448      |
| Vitamin B1    | per µg/MJ   | 1.00 (1.00, 1.00)                              | 0.002    | 1.00 (1.00, 1.00) | 0.805      | 1.00 (1.00, 1.00)           | <0.001   | 1.00 (1.00, 1.00) | 0.543      |
| Vitamin B2    | per µg/MJ   | 1.00 (1.00, 1.00)                              | <0.001   | 1.00 (1.00, 1.00) | 0.616      | 1.00 (1.00, 1.00)           | 0.009    | 1.00 (1.00, 1.00) | 0.061      |
| Vitamin B6    | per µg/MJ   | 1.00 (1.00, 1.00)                              | <0.001   | 1.00 (1.00, 1.00) | 0.026      | 1.00 (1.00, 1.00)           | 0.002    | 1.00 (1.00, 1.00) | 0.439      |
| Vitamin B12   | per µg/MJ   | 1.33 (1.27, 1.41)                              | <0.001   | 1.08 (1.02, 1.15) | 0.008      | 1.37 (1.26, 1.49)           | <0.001   | 1.00 (0.91, 1.10) | 0.927      |
| Folate        | per µg/MJ   | 1.00 (1.00, 1.01)                              | <0.001   | 1.00 (1.00, 1.00) | 0.406      | 1.00 (1.00, 1.01)           | 0.010    | 1.00 (1.00, 1.00) | 0.653      |
| Vitamin A     | per µg/MJ   | 1.00 (1.00, 1.00)                              | <0.001   | 1.00 (1.00, 1.00) | 0.023      | 1.00 (1.00, 1.00)           | <0.001   | 1.00 (1.00, 1.00) | 0.831      |
| Vitamin D     | per µg/MJ   | 1.34 (1.23, 1.47)                              | <0.001   | 1.08 (0.98, 1.20) | 0.138      | 1.37 (1.19, 1.58)           | <0.001   | 0.99 (0.84, 1.17) | 0.878      |
| Vitamin E     | per µg/MJ   | 1.00 (1.00, 1.00)                              | <0.001   | 1.00 (1.00, 1.00) | 0.875      | 1.00 (1.00, 1.00)           | <0.001   | 1.00 (1.00, 1.00) | 0.681      |
| Calcium       | per mg/MJ   | 1.00 (1.00, 1.00)                              | 0.177    | 1.00 (1.00, 1.00) | 0.379      | 1.00 (1.00, 1.00)           | 0.171    | 1.00 (1.00, 1.00) | <0.001     |
| Iron          | per mg/MJ   | 1.01 (0.98, 1.04)                              | 0.467    | 0.99 (0.96, 1.02) | 0.390      | 1.00 (0.96, 1.05)           | 0.992    | 0.96 (0.91, 1.01) | 0.078      |
| Zinc          | per mg/MJ   | 1.37 (1.27, 1.48)                              | <0.001   | 1.08 (0.99, 1.18) | 0.070      | 1.43 (1.27, 1.61)           | <0.001   | 1.01 (0.88, 1.15) | 0.934      |

HR, Hazards Ratio; 95%CI, 95% Confidence Interval; SFAs, saturated fatty acids; PUFAs, polyunsaturated fatty acids; MUFAs, monounsaturated fatty acids.

\* Adjusted for age, ethnicity, marital status, socioeconomic status, physical activity, body mass index, smoking status, alcohol consumption, and total energy intake

Supplementary Table S9 Sensitivity analysis excluding participants aged <65y at diagnosis on main foods (per 10g/MJ) within the UK Women's Cohort Study

|                    | Risk of Pre-Frailty or more severe (HR, 95%CI) |          |                   |            | Risk of Frailty (HR, 95%CI) |          |                   |            |
|--------------------|------------------------------------------------|----------|-------------------|------------|-----------------------------|----------|-------------------|------------|
|                    | Unadjusted                                     | <i>P</i> | Adjusted*         | <i>P</i> * | Unadjusted                  | <i>P</i> | Adjusted*         | <i>P</i> * |
| <b>Food groups</b> |                                                |          |                   |            |                             |          |                   |            |
| Vegetables         | 0.98 (0.97, 0.99)                              | 0.003    | 0.99 (0.98, 1.01) | 0.396      | 0.97 (0.95, 0.99)           | 0.005    | 0.98 (0.96, 1.01) | 0.154      |
| Fruits             | 1.01 (1.00, 1.02)                              | 0.284    | 1.00 (0.99, 1.01) | 0.765      | 1.01 (1.00, 1.03)           | 0.135    | 1.00 (0.98, 1.01) | 0.704      |
| Total fish         | 1.17 (1.09, 1.25)                              | <0.001   | 0.98 (0.90, 1.06) | 0.597      | 1.12 (1.00, 1.24)           | 0.047    | 0.89 (0.78, 1.01) | 0.075      |
| Processed meat     | 1.88 (1.63, 2.18)                              | <0.001   | 1.30 (1.09, 1.55) | 0.004      | 1.96 (1.58, 2.44)           | <0.001   | 1.34 (1.03, 1.75) | 0.030      |
| Red meat           | 1.33 (1.26, 1.41)                              | <0.001   | 1.16 (1.09, 1.24) | <0.001     | 1.35 (1.24, 1.47)           | <0.001   | 1.17 (1.06, 1.30) | 0.002      |
| Poultry            | 1.17 (1.05, 1.30)                              | 0.004    | 1.08 (0.96, 1.22) | 0.194      | 1.16 (0.99, 1.36)           | 0.071    | 1.08 (0.90, 1.29) | 0.396      |
| Total meat         | 1.22 (1.17, 1.27)                              | <0.001   | 1.11 (1.06, 1.16) | <0.001     | 1.23 (1.16, 1.30)           | <0.001   | 1.11 (1.04, 1.19) | 0.002      |

HR, Hazards Ratio; 95%CI, 95% Confidence Interval.

\*Adjusted for age, ethnicity, marital status, socioeconomic status, physical activity, body mass index, smoking status, alcohol consumption, and total energy intake;

Supplementary Table S10 Sensitivity analysis excluding participants aged <65y at diagnosis on nutrient intakes within the UK Women's Cohort Study

|               |             | Risk of Pre-Frailty or more severe (HR, 95%CI) |          |                   |            | Risk of Frailty (HR, 95%CI) |          |                   |            |
|---------------|-------------|------------------------------------------------|----------|-------------------|------------|-----------------------------|----------|-------------------|------------|
|               |             | Unadjusted                                     | <i>P</i> | Adjusted*         | <i>P</i> * | Unadjusted                  | <i>P</i> | Adjusted*         | <i>P</i> * |
| Energy intake | per MJ      | 1.01 (1.00, 1.02)                              | 0.014    | 1.00 (1.00, 1.01) | 0.315      | 1.01 (1.00, 1.02)           | 0.099    | 1.00 (0.99, 1.02) | 0.628      |
| Protein       | per %energy | 1.03 (1.02, 1.04)                              | <0.001   | 1.01 (1.01, 1.03) | 0.003      | 1.03 (1.01, 1.04)           | <0.001   | 1.00 (0.99, 1.02) | 0.761      |
| Carbohydrate  | per %energy | 1.00 (1.00, 1.00)                              | 0.782    | 1.00 (1.00, 1.00) | 0.645      | 1.00 (0.99, 1.00)           | 0.606    | 1.00 (0.99, 1.00) | 0.195      |
| Fat           | per %energy | 1.00 (1.00, 1.00)                              | 0.885    | 1.00 (0.99, 1.00) | 0.231      | 1.00 (1.00, 1.01)           | 0.170    | 1.00 (1.00, 1.01) | 0.364      |
| SFAs          | per %energy | 1.02 (1.01, 1.02)                              | <0.001   | 1.00 (0.99, 1.01) | 0.990      | 1.03 (1.02, 1.04)           | <0.001   | 1.01 (1.00, 1.02) | 0.040      |
| PUFAs         | per %energy | 0.95 (0.94, 0.97)                              | <0.001   | 0.99 (0.98, 1.01) | 0.379      | 0.94 (0.92, 0.96)           | <0.001   | 0.98 (0.96, 1.01) | 0.136      |
| MUFAs         | per %energy | 0.99 (0.98, 1.00)                              | 0.104    | 0.99 (0.98, 1.00) | 0.245      | 1.00 (0.98, 1.02)           | 0.966    | 1.01 (0.99, 1.02) | 0.536      |
| Vitamin C     | per mg/MJ   | 1.00 (1.00, 1.00)                              | 0.384    | 1.00 (1.00, 1.00) | 0.446      | 1.00 (0.99, 1.00)           | 0.505    | 1.00 (0.99, 1.00) | 0.303      |
| Vitamin B1    | per µg/MJ   | 1.00 (1.00, 1.00)                              | 0.001    | 1.00 (1.00, 1.00) | 0.140      | 1.00 (1.00, 1.00)           | <0.001   | 1.00 (1.00, 1.00) | 0.106      |
| Vitamin B2    | per µg/MJ   | 1.00 (1.00, 1.00)                              | <0.001   | 1.00 (1.00, 1.00) | 0.014      | 1.00 (1.00, 1.00)           | 0.057    | 1.00 (1.00, 1.00) | 0.242      |
| Vitamin B6    | per µg/MJ   | 1.00 (1.00, 1.00)                              | <0.001   | 1.00 (1.00, 1.00) | 0.003      | 1.00 (1.00, 1.00)           | 0.009    | 1.00 (1.00, 1.00) | 0.679      |
| Vitamin B12   | per µg/MJ   | 1.34 (1.25, 1.43)                              | <0.001   | 1.09 (1.01, 1.18) | 0.027      | 1.24 (1.12, 1.38)           | <0.001   | 0.96 (0.85, 1.08) | 0.474      |
| Folate        | per µg/MJ   | 1.00 (1.00, 1.01)                              | <0.001   | 1.00 (1.00, 1.00) | 0.068      | 1.00 (1.00, 1.01)           | 0.050    | 1.00 (1.00, 1.00) | 0.743      |
| Vitamin A     | per µg/MJ   | 1.00 (1.00, 1.00)                              | <0.001   | 1.00 (1.00, 1.00) | 0.482      | 1.00 (1.00, 1.00)           | <0.001   | 1.00 (1.00, 1.00) | 0.385      |
| Vitamin D     | per µg/MJ   | 1.38 (1.24, 1.54)                              | <0.001   | 1.11 (0.97, 1.26) | 0.122      | 1.30 (1.10, 1.54)           | 0.002    | 0.97 (0.79, 1.19) | 0.783      |
| Vitamin E     | per µg/MJ   | 1.00 (1.00, 1.00)                              | 0.001    | 1.00 (1.00, 1.00) | 0.799      | 1.00 (1.00, 1.00)           | 0.019    | 1.00 (1.00, 1.00) | 0.718      |
| Calcium       | per mg/MJ   | 1.00 (1.00, 1.00)                              | 0.668    | 1.00 (1.00, 1.00) | 0.576      | 1.00 (1.00, 1.00)           | 0.066    | 1.00 (1.00, 1.00) | 0.001      |
| Iron          | per mg/MJ   | 1.05 (1.01, 1.09)                              | 0.019    | 1.04 (0.99, 1.08) | 0.098      | 1.01 (0.95, 1.07)           | 0.811    | 0.98 (0.92, 1.05) | 0.620      |
| Zinc          | per mg/MJ   | 1.53 (1.37, 1.70)                              | <0.001   | 1.22 (1.09, 1.38) | 0.001      | 1.39 (1.19, 1.63)           | <0.001   | 1.06 (0.89, 1.27) | 0.511      |

HR, Hazards Ratio; 95%CI, 95% Confidence Interval; SFAs, saturated fatty acids; PUFAs, polyunsaturated fatty acids; MUFAs, monounsaturated fatty acids.

\* Adjusted for age, ethnicity, marital status, socioeconomic status, physical activity, body mass index, smoking status, alcohol consumption, and total energy intake
